# Supplementary material
Source: HighWire-hosted journal article supplement (https://bmjpaedsopen.bmj.com/content/1/1/e000092)
Supplement: inline-supplementary-material-3 [file inline-supplementary-material-3.pdf]

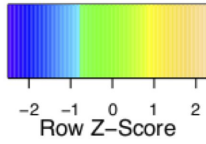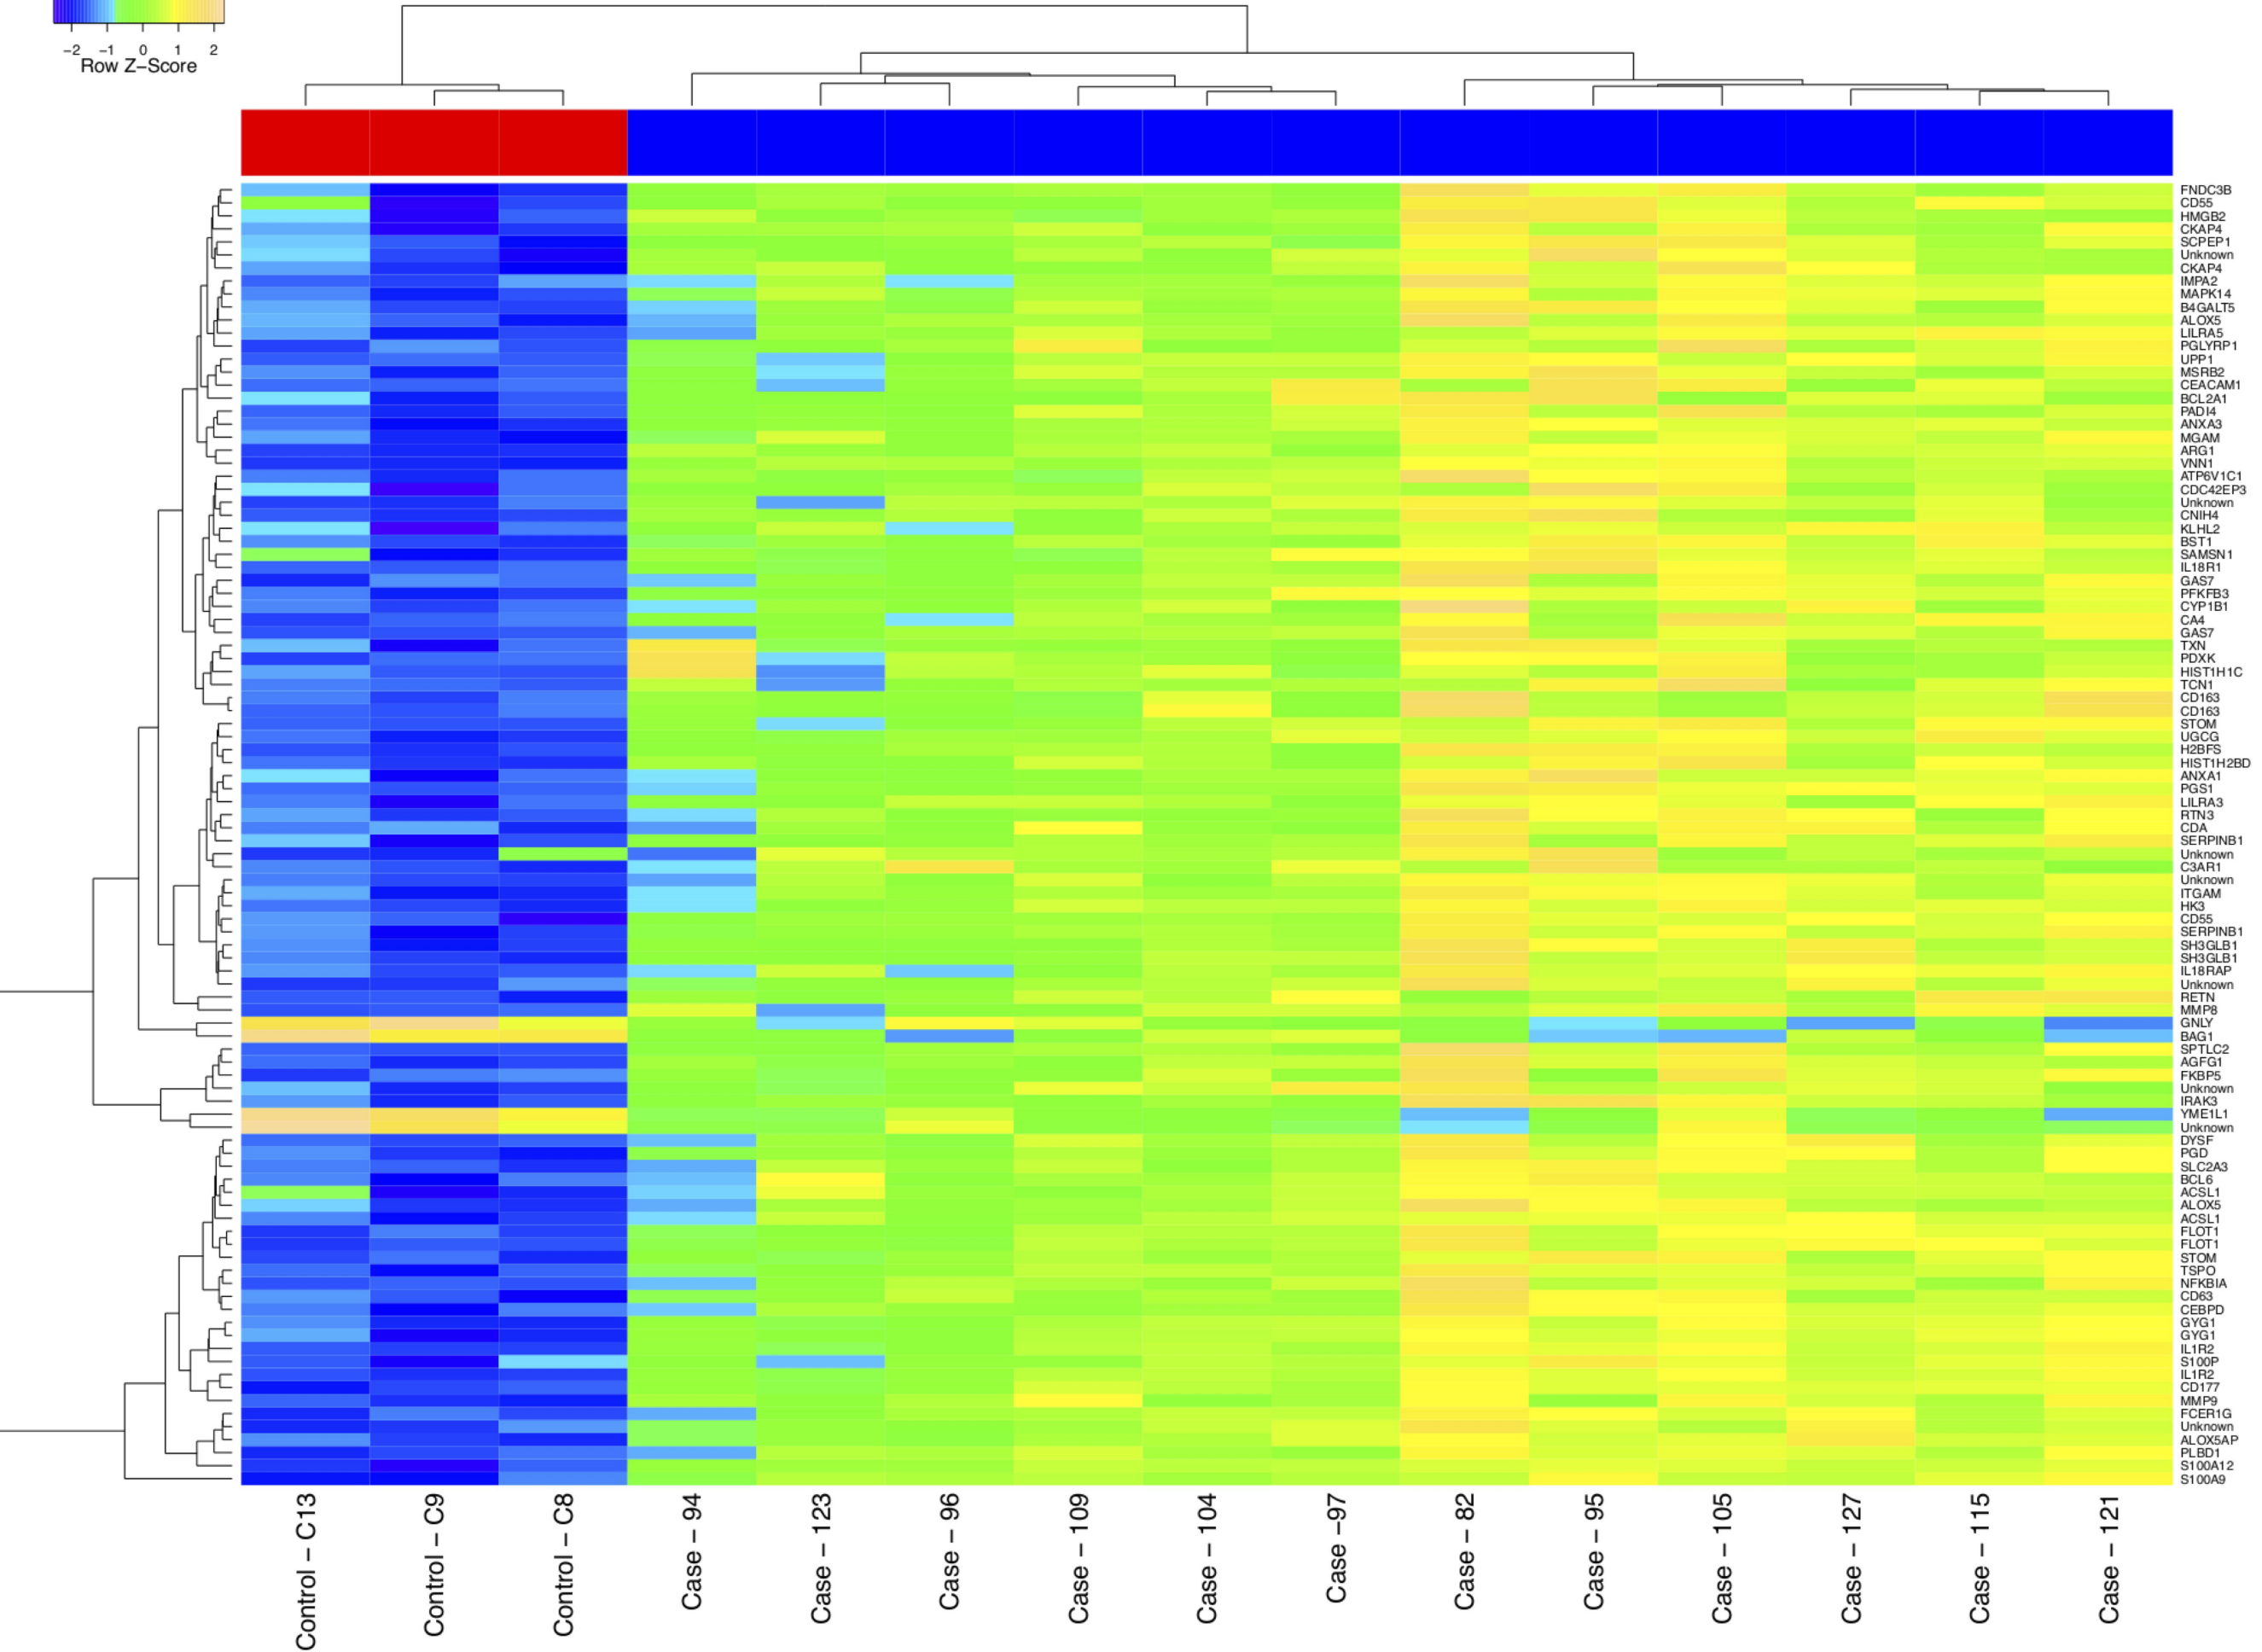

Control – C13

Control – C9

Control – C8

Case – 94

Case – 123

Case – 96

Case – 109

Case – 104

Case – 97

Case – 82

Case – 95

Case – 105

Case – 127

Case – 115

Case – 121

- FNDC3B
- CD55
- HMGB2
- CKAP4
- SCPEP1
- Unknown
- CKAP4
- MAPK14
- B4GALT5
- ALOX5
- LILRA5
- PGLYRP1
- UPP1
- MSRB2
- CEACAM1
- BCL2A1
- PAD14
- ANXA3
- MGAM
- ARG1
- VNN1
- ATP6V1C1
- CDC42EP3
- Unknown
- CNIH4
- KLHL2
- BST1
- SAMSN1
- IL18R1
- GAS7
- PFKFB3
- CYP1B1
- CA4
- GAS7
- TXN
- PDXK
- HIST1H1C
- TCN1
- CD163
- CD163
- STOM
- UGCG
- H2BFS
- HIST1H2BD
- ANXA1
- PGS1
- LILRA3
- RTN3
- CDA
- SERPINB1
- Unknown
- C3AR1
- Unknown
- ITGAM
- HK3
- CD55
- SERPINB1
- SH3GLB1
- SH3GLB1
- IL18RAP
- Unknown
- RETN
- MMP9
- GMLY
- BAG1
- SPTLC2
- AGFG1
- FKBP5
- Unknown
- IRAK3
- YME1L1
- Unknown
- DYSF
- PGD
- SLC2A3
- BCL6
- ACSL1
- ALOX5
- ACSL1
- FLOT1
- FLOT1
- STOM
- TSPC
- NFKBIA
- CD63
- CEBPD
- GYG1
- GYG1
- IL1R2
- S100P
- IL1R2
- CD177
- MMP9
- FCER1G
- Unknown
- ALOX5AP
- PLBD1
- S100A12
- S100A9
